# Supplementary material for: Self-adhesive polyzwitterionic hydrogel electrolytes for long-life flexible zinc-ion batteries
Source: Royal Society of Chemistry journal article supplement (doi:10.1039/d4ta01125b), 2024-01-01
Supplement: d4ta01125b1.pdf [file d4ta01125b1.pdf]

## Self-adhesive Polyzwitterionic Hydrogel Electrolytes for Long-life Flexible Zinc-ion Batteries

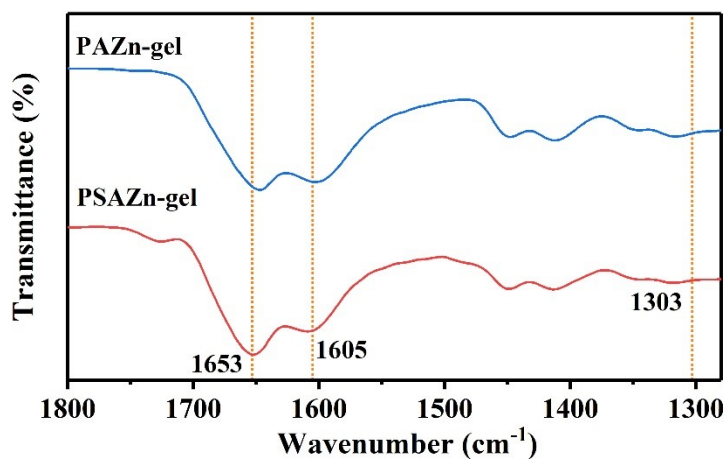

Figure S1. Localized view of FTIR spectra of PSAZn-gel and PAZn-gel.

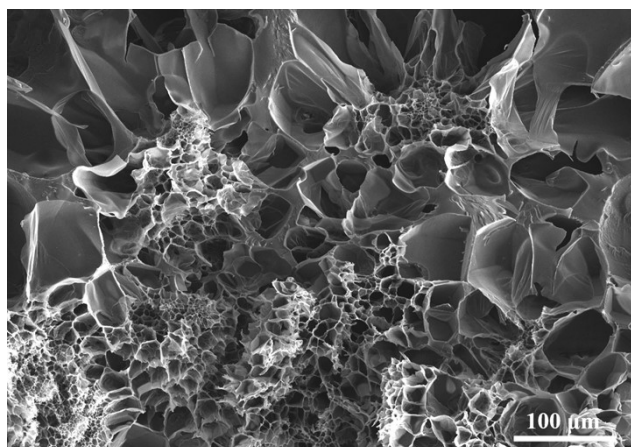

Figure S2. Cross-section SEM image of PAZn-gel.

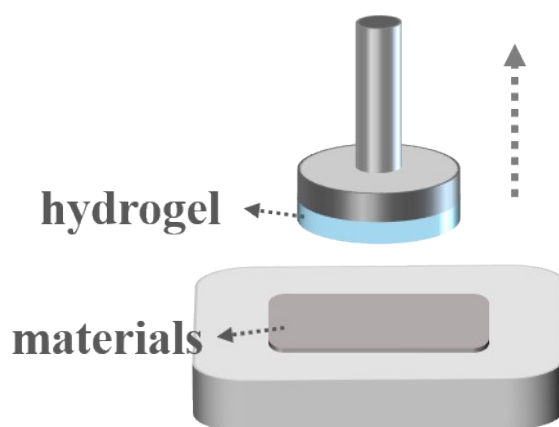

Figure S3. Schematic diagram of adhesion strength test method

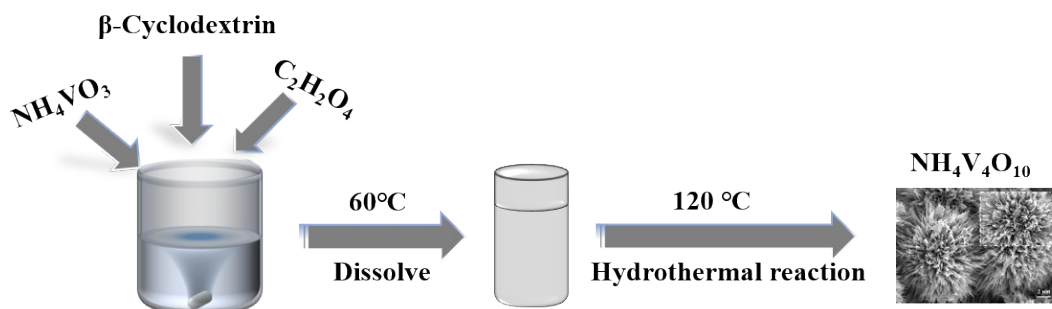

**Figure S4.** process flow diagram for the preparation of NHVO

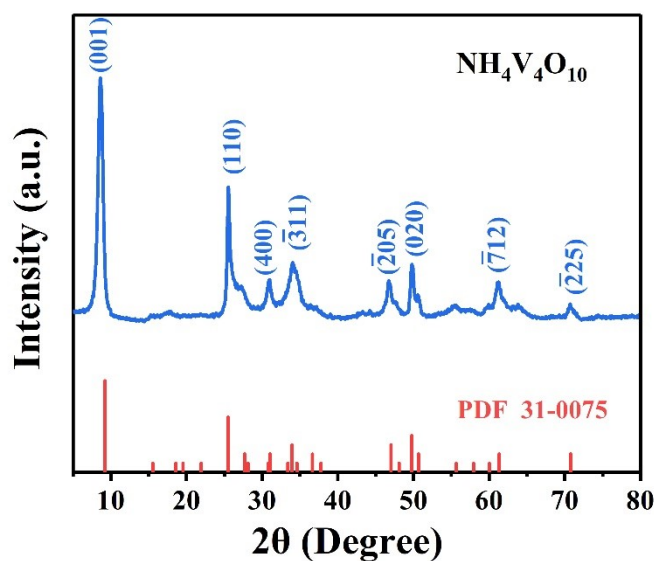

**Figure S5.** XRD pattern of NHVO

The structure of the synthesized material was determined by X-ray diffraction (XRD) analysis, and the structure of the obtained material was determined to be  $\text{NH}_4\text{V}_4\text{O}_{10}$  by comparison with the standard PDF card (PDF 31-0075)

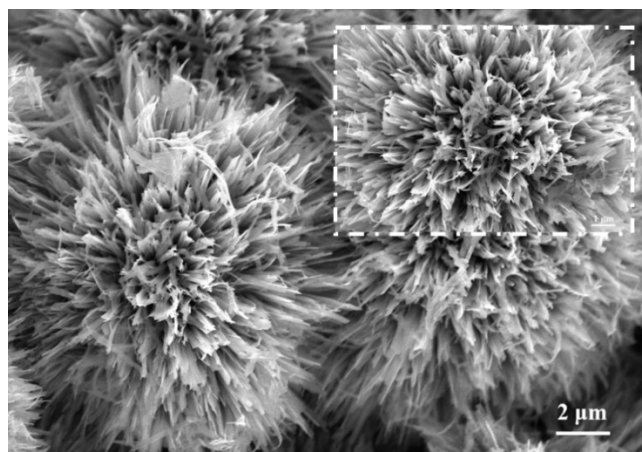

**Figure S6.** SEM image of the NHVO

The SEM image clearly shows that the synthesized ammonium vanadate exhibits a uniform nanoflower-like structure, which has a large specific surface area and helps to increase the specific capacity of the battery.

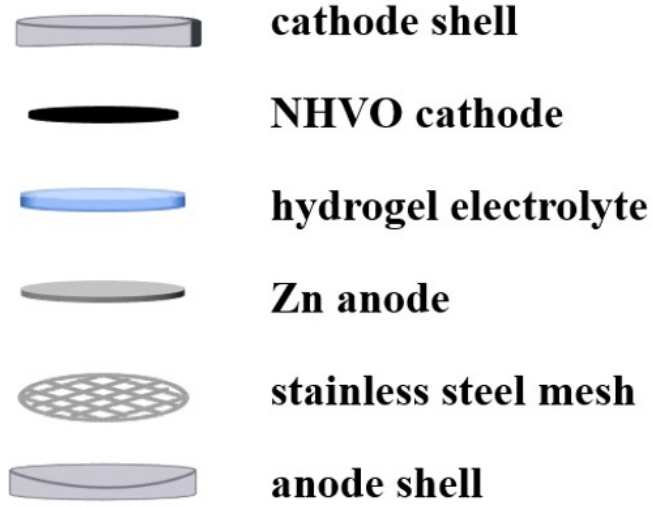

**Figure S7.** Zn||electrolyte||NHVO coin cell assembly flowchart

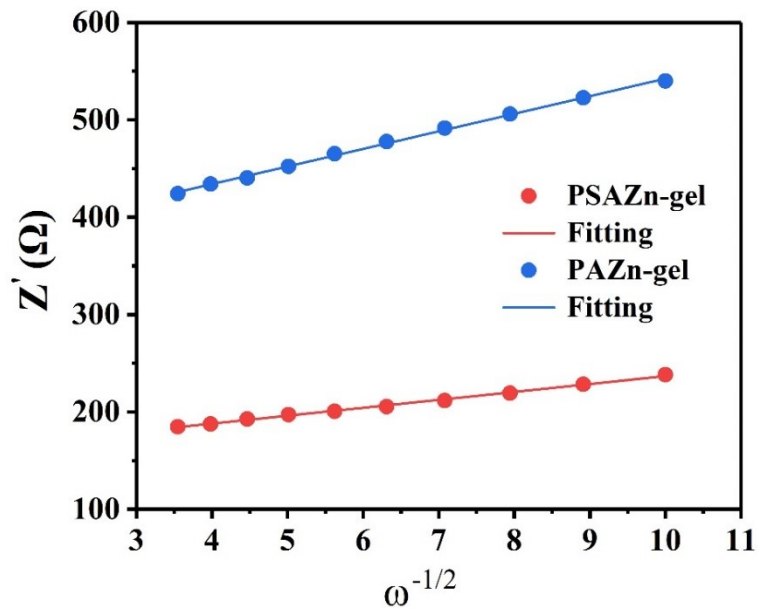

**Figure S8.** Linear fitting of the relationship between  $Z'$  and  $\omega^{-1/2}$  in the low-frequency region in the EIS curves of PSAZn-gel and PAZn-gel

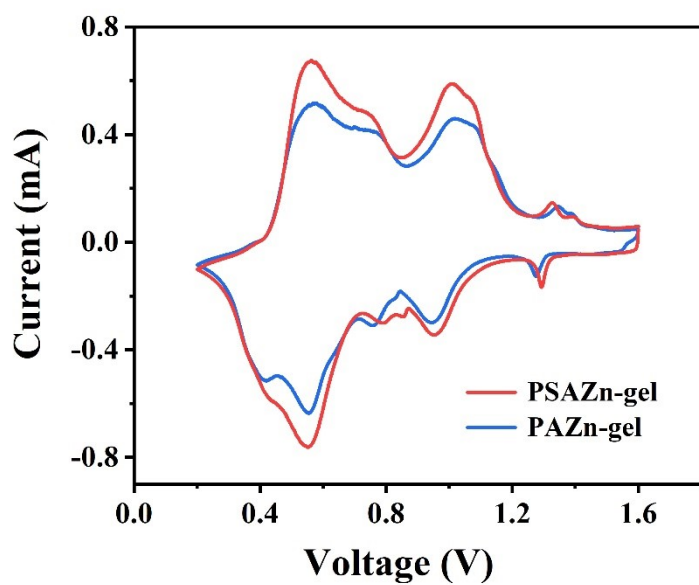

**Figure S9.** Second loop CV cycling curves of PSAZn-gel and PAZn-gel electrolytes at a scan rate of  $0.2 \text{ mV s}^{-1}$ .

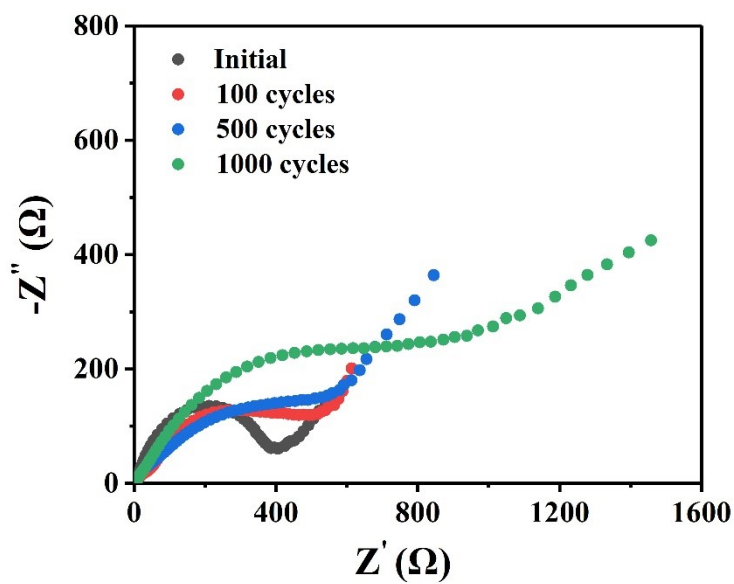

**Figure S10.** EIS changes of PAZn-gel electrolyte before and after cycling.

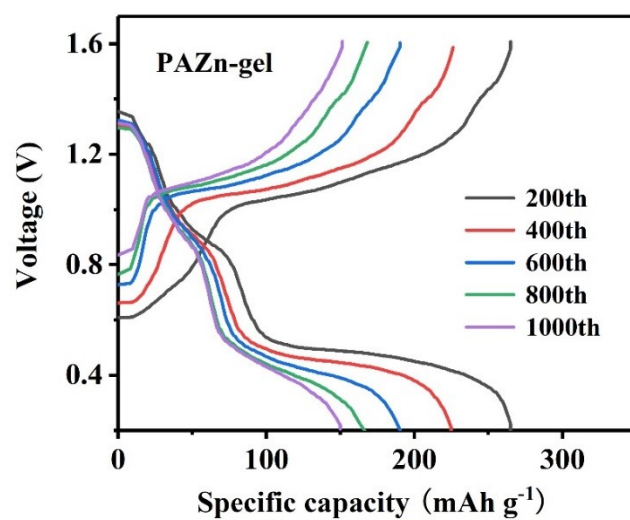

**Figure S11.** Charge/discharge curves at different cycle numbers of NHVO||PAZn-gel||Zn battery at  $5 \text{ A g}^{-1}$ .

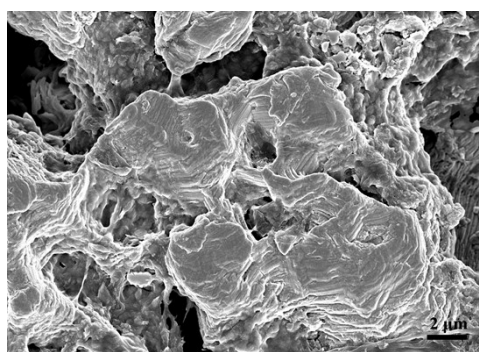

**Figure S12.** SEM images of Zn anode surface after 1000 cycles of NHVO||PSAZn-gel||Zn battery at  $5 \text{ A g}^{-1}$ .

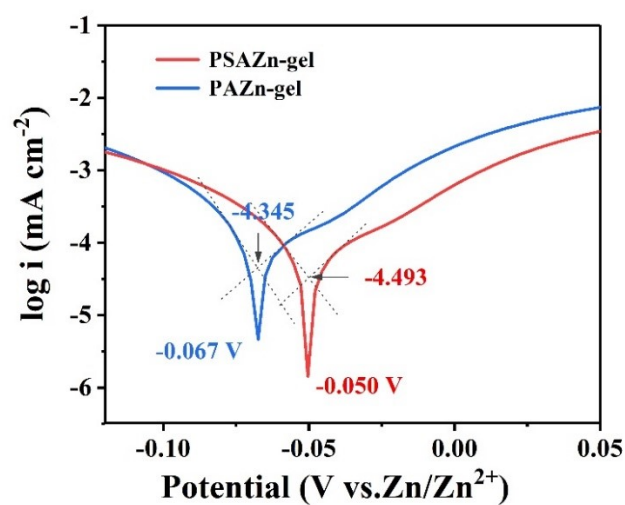

**Figure S13.** Tafel curves of the Zn anode in PSAZn-gel and PAZn-gel electrolyte.

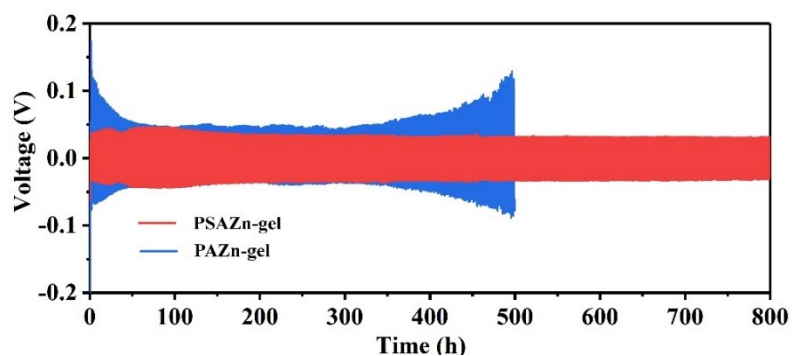

**Figure S14.** Cycling performance of the Zn symmetric cells at  $1 \text{ mA cm}^{-2}$  and  $1 \text{ mAh cm}^{-2}$

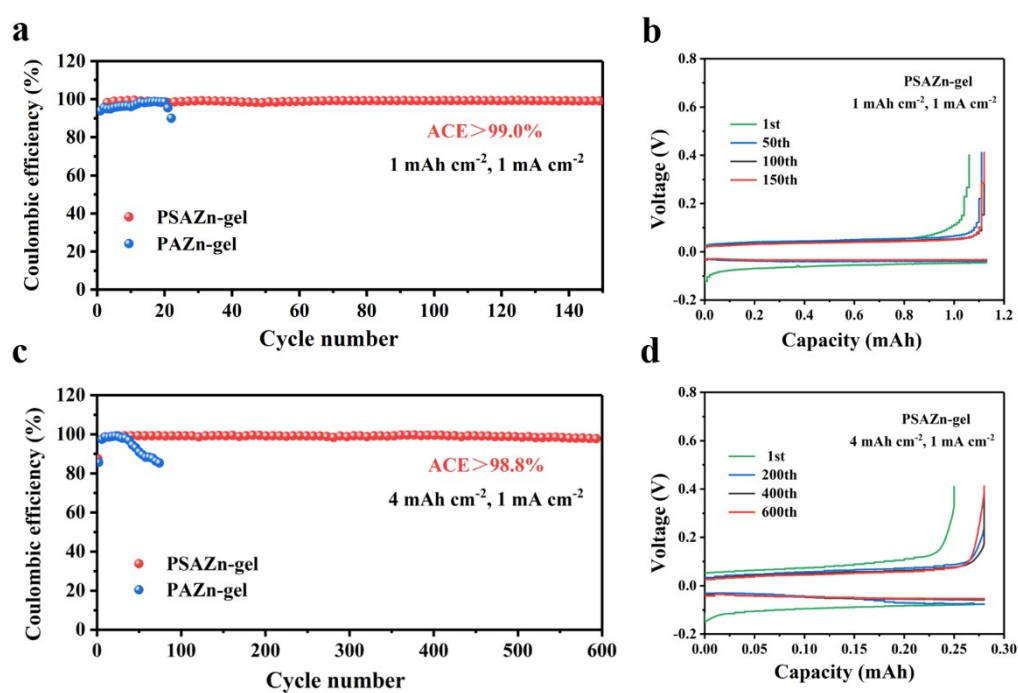

**Figure S15.** (a) Coulombic efficiency of Zn||Cu cells with PSAZn-gel and PAZn-gel electrolytes at  $1 \text{ mA cm}^{-2}$  and  $1 \text{ mAh cm}^{-2}$ . (b) Voltage-capacity curves of Zn||PSAZn-gel||Cu cell. (c) Coulombic efficiency of Zn||Cu cells with PSAZn-gel and PAZn-gel electrolytes at  $1 \text{ mA cm}^{-2}$  and  $4 \text{ mAh cm}^{-2}$ . (d) Voltage-capacity curves of Zn||PSAZn-gel||Cu cell.

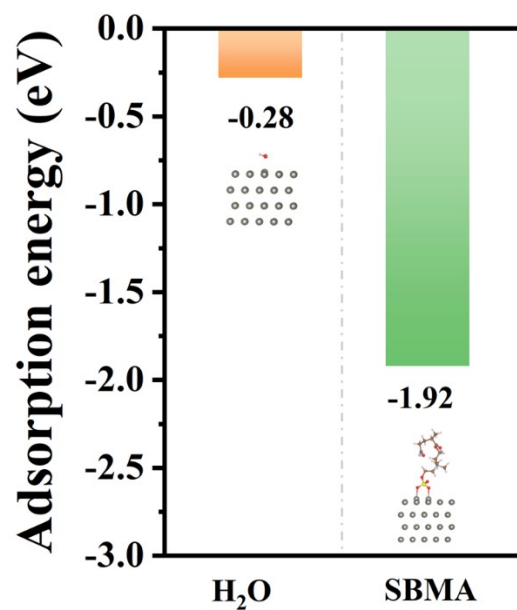

Figure S16. Adsorption energy calculations for Zn-H<sub>2</sub>O and Zn-SBMA.

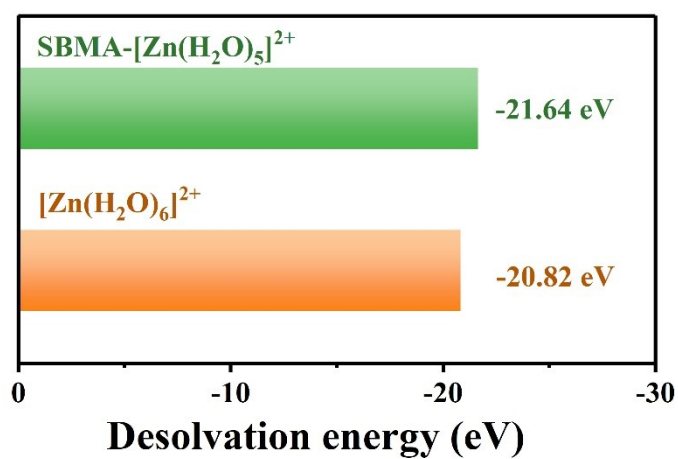

Figure S17. Desolvation energy calculations for SBMA-[Zn(H<sub>2</sub>O)<sub>5</sub>]<sup>2+</sup> and [Zn(H<sub>2</sub>O)<sub>6</sub>]<sup>2+</sup>



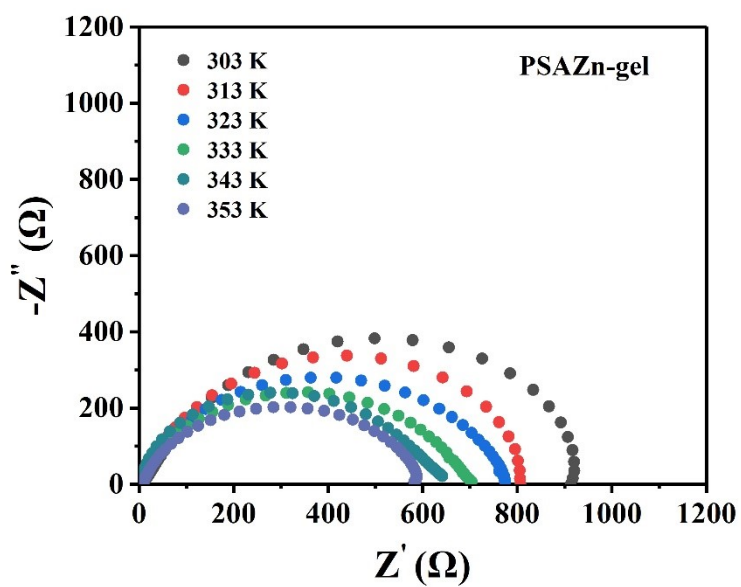

Figure S18. Nyquist plots of Zn||PSAZn-gel||Zn at different temperatures

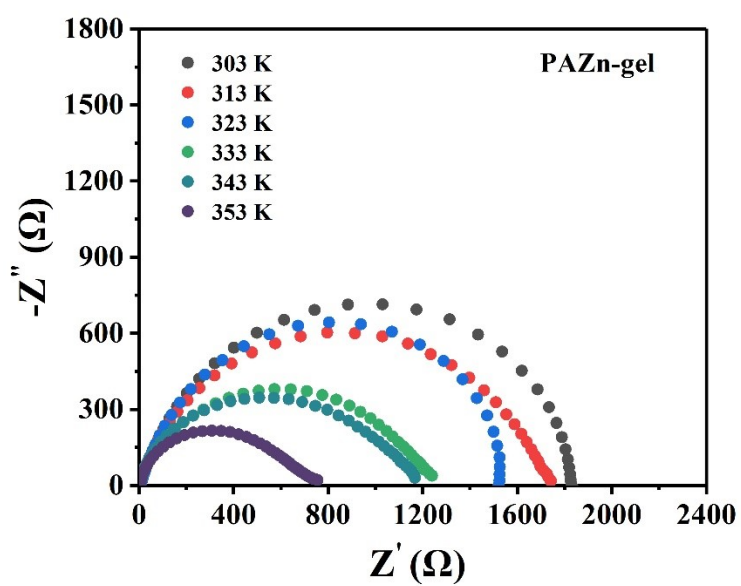

Figure S19. Nyquist plots of Zn||PAZn-gel||Zn at different temperatures



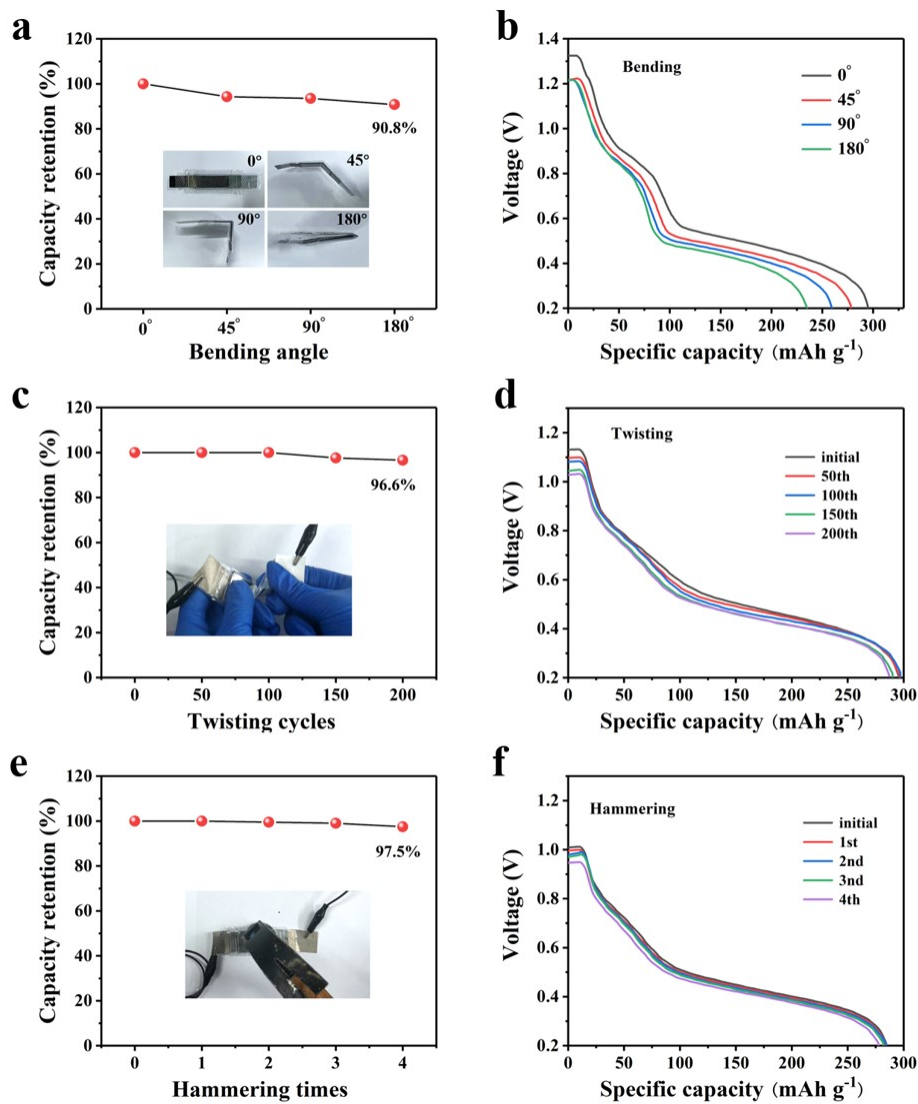

**Figure S20.** Electrochemical performance of flexible Zn||PSAZn-gel||NHVO batteries in different extreme tests. (a) Capacity retention and (b) charge/discharge curves of the bending test. (c) Capacity retention and (d) charge/discharge curves of the twisting test. (e) Capacity retention and (f) charge/discharge curves of the hammering test.

**Table S1.** Comparison of the performance of hydrogel electrolytes of different systems

| Electrolyte              | Elongation | Substrate/Adhesion strength | Ionic conductivity (mS cm <sup>-1</sup> ) | Zn <sup>2+</sup> transference number | Ref. |
|--------------------------|------------|-----------------------------|-------------------------------------------|--------------------------------------|------|
| This work                | 620%       | Zn/108 kPa                  | 59.0                                      | 0.81                                 |      |
| PAM/chitosan             | > 150%     | -                           | 38.1                                      | -                                    | [1]  |
| XG/PAM/CNF               | -          | Al/42.7 kPa                 | 28.8                                      | -                                    | [2]  |
| SA/AM/SBMA               | 310.20%    | Zn/2.1-2.6 kPa              | 25                                        | 0.64                                 | [3]  |
| Con-CMC hydrogel         | 185%       | -                           | 34.5                                      | -                                    |      |
| PAM/Al-Hbimcp            | -          | Zn/19.1 kPa                 | 38.2                                      | 0.773                                | [4]  |
| LCNFs/PAM                | -          | -                           | 21.57                                     | 0.79                                 | [5]  |
| PAM/CMC/XG               | 443.70%    | -                           | 30                                        | 0.63                                 | [6]  |
| DMAPS/AAm/fiberglass     | -          | -                           | 24.32                                     | -                                    | [7]  |
| CMCS/PAM                 | > 600%     | -                           | 23.61                                     | 0.76                                 | [8]  |
| Carrageenan/wool keratin | ≈720%      | -                           | 1.7                                       | 0.6                                  | [9]  |
| PVA/SA/XG/GA             |            | -                           | 18.86                                     | 0.8                                  | [10] |
| AS/SAS-1.5               | < 350%     | -                           | 29.2                                      | 0.616                                | [11] |
| CMC                      | 185%       | -                           | 34.5                                      | -                                    | [12] |
| DAA/PAM                  | -          | Zn/19.8 kPa                 | 24.11                                     | 0.79                                 | [13] |
| PAM/xanthan gum          | 580%       | Zn foil/3 kPa               | 16.8                                      | -                                    | [14] |
| TA/CNC/SBMA/AA           | 507%       | Zn/ < 30 kPa                | 74.3                                      | -                                    | [15] |

## Reference

- [1] Y. Q. Hu, Z. Wang, Y. Z. Li, P. W. Liu, X. L. Liu, G. X. Liang, D. Zhang, X. Fan, Z. G. Lu, W. X. Wang, *Chemical Engineering Journal* 2024, 479.
- [2] B. J. Wang, J. M. Li, C. Y. Hou, Q. H. Zhang, Y. G. Li, H. Z. Wang, *Acs Applied Materials & Interfaces* 2020, 12, 46005-46014.
- [3] T. L. Wu, C. C. Ji, H. Y. Mi, F. J. Guo, G. Z. Guo, B. Zhang, M. Z. Wu, *Journal of Materials Chemistry A* 2022, 10, 25701-25713.
- [4] Z. J. Chen, T. Y. Shen, M. H. Zhang, X. Xiao, H. Q. Wang, Q. R. Lu, Y. L. Luo, Z. Jin, C. H. Li, *Advanced Functional Materials* 2024.
- [5] Z. L. Li, G. Q. Zhou, L. Ye, J. Y. He, W. W. Xu, S. Hong, W. M. Chen, M. C. Li, C. Z. Liu, C. T. Mei, *Chemical Engineering Journal* 2023, 472.
- [6] C. J. Jin, C. C. Yang, H. Y. Mi, C. C. Ji, F. J. Guo, C. Z. Liu, Z. Q. Liu, N. J. Yang, *Journal of Energy Chemistry* 2023, 86, 373-381.
- [7] O. Zhanadilov, H. J. Kim, H. J. Lai, J. C. Jiang, A. Konarov, A. Mentbayeva, Z. Bakenov, K. S. Sohn, P. Kaghazchi, S. T. Myung, *Small* 2023, 19.
- [8] S. W. Huang, L. Hou, T. Y. Li, Y. C. Jiao, P. Y. Wu, *Advanced Materials* 2022, 34.
- [9] Y. Y. Shao, J. Zhao, W. G. Hu, Z. Xia, J. R. Luo, Y. J. Zhou, L. Zhang, X. Z. Yang, N. Ma, D. Z. Yang, Q. W. Shi, J. Y. Sun, L. Zhang, J. S. Hui, Y. L. Shao, *Small* 2022, 18.
- [10] C. Y. Fu, Y. P. Wang, C. G. Lu, S. Zhou, Q. He, Y. Z. Hu, M. Y. Feng, Y. L. Wan, J. D. Lin, Y. F. Zhang, A. Q. Pan, *Energy Storage Materials* 2022, 51, 588-598.
- [11] J. X. Li, J. F. Ren, C. X. Li, P. X. Li, T. T. Wu, S. W. Liu, L. Wang, *Nano Research* 2022, 15, 7190-7198.
- [12] Y. H. Quan, H. Ma, M. F. Chen, W. J. Zhou, Q. H. Tian, X. Han, J. Z. Chen, *Acs Applied Materials & Interfaces* 2023, 15, 44974-44983.
- [13] H. R. Wang, W. Wei, X. X. Liu, S. C. Xu, Y. F. Dong, R. H. He, *Energy Storage Materials* 2023, 55, 597-605.
- [14] Y. Q. Deng, Y. H. Wu, L. L. Wang, K. F. Zhang, Y. Wang, L. F. Yan, *Journal*

of Colloid and Interface Science 2023, 633, 142-154.

- [15] Q. J. Fu, S. W. Hao, L. Meng, F. Xu, J. Yang, *Acs Nano* 2021, 15, 18469-18482.
